# Supplementary material for: Nutritional Behaviors of Polish Adolescents: Results of the Wise Nutrition—Healthy Generation Project
Source: PubMed Central journal article supplement (PMC6682866; doi:10.3390/nu11071592), 2019-07-13
Supplement: nutrients-11-01592-s001.pdf [file nutrients-11-01592-s001.pdf]

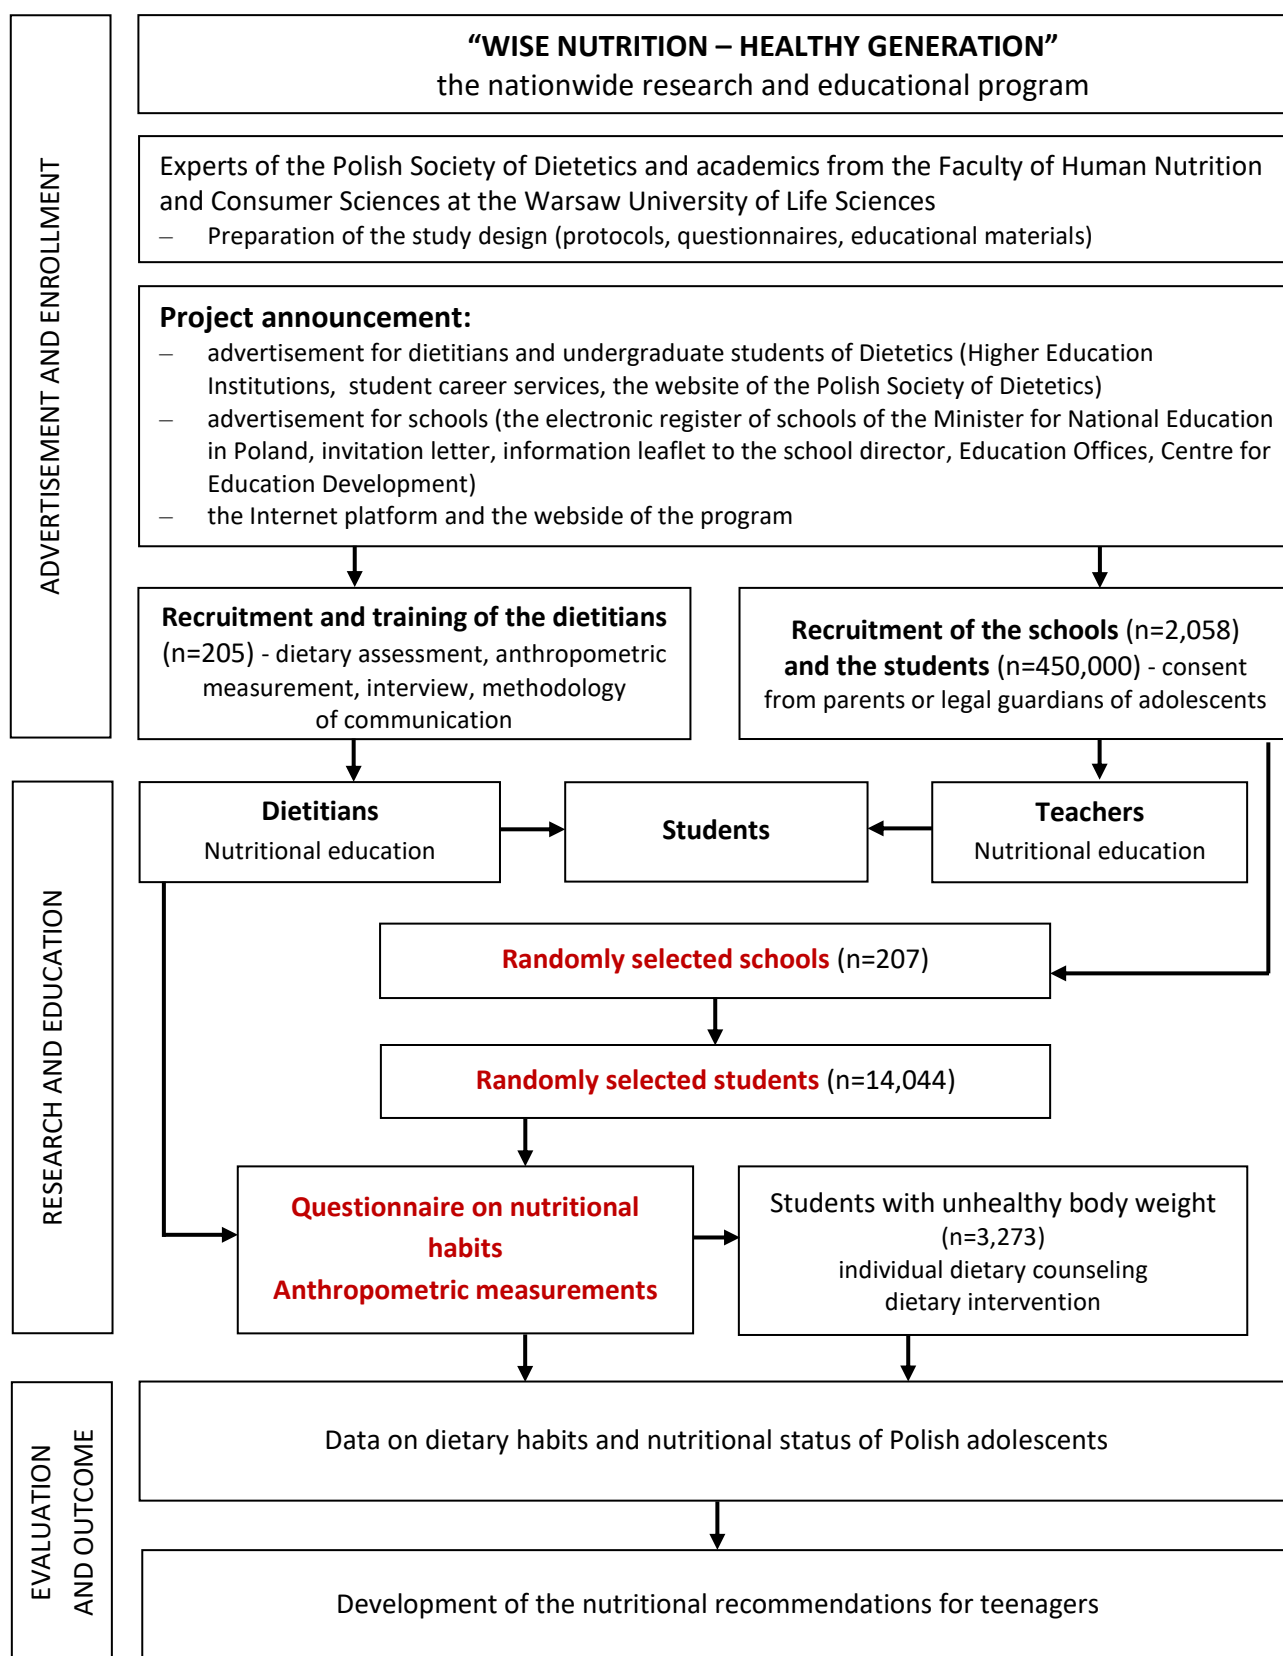

Figure 1. The Wise Nutrition - Healthy Generation project diagram (the part of the program presented in the article is marked in red).
